# Supplementary material
Source: publisher site journal article supplement (https://oneecosystem.pensoft.net/article/download/suppl/4308993/)
Supplement: Supplementary file 1

| **Code** | **Νame of the habitat type** |
| --- | --- |
| **COASTAL AND HALOPHYTIC HABITATS** | |
| **1210** | Annual vegetation of drift lines |
| **1240** | Vegetated sea cliffs of the Mediterranean coasts with endemic *Limonium spp* |
| **1310** | *Salicornia* and other annuals colonizing mud and sand |
| **1410** | Mediterranean salt meadows (Juncetalia maritimi) |
| **1420** | Mediterranean and thermo-Atlantic halophilous scrubs (*Sarcocornietea fruticosi*) |
| **1430** | Halo-nitrophilous scrubs (Pegano-Salsoletea) |
| **1510*** | Mediterranean salt steppes (Limonietalia) |
| **COASTAL SAND DUNES AND INLAND DUNES** | |
| **2110** | Embryonic shifting dunes |
| **2120** | Shifting dunes along the shoreline with *Ammophila arenaria* (white dunes) |
| **2190** | Humid dune slacks |
| **2220** | Dunes with*Euphorbia terracina* |
| **2230** | Malcolmietalia dune grasslands |
| **2250*** | Coastal dunes with *Juniperus* spp. |
| **2260** | Cisto-Lavanduletalia dune sclerophyllous scrubs |
| **2270*** | Wooded dunes with *Pinus pinea* and/or *Pinus pinaster* |
| **FRESHWATER HABITATS** | |
| **3130** | Oligotrophic to mesotrophic standing waters with vegetation of the *Littorelletea uniflorae* and/or *Isoeto-Nanojuncetea* |
| **3140** | Hard oligo-mesotrophic waters with benthic vegetation of *Chara* spp. |
| **3150** | Natural eutrophic lakes with Magnopotamion or Hydrocharition- type vegetation |
| **3170*** | Mediterranean temporary ponds |
| **3240** | Alpine rivers and their ligneous vegetation with *Salix elaeagnos* |
| **3250** | Constantly flowing Mediterranean rivers with *Glaucium flavum* |
| **3260** | Water courses of plain to montane levels with the *Ranunculion fluitantis* and *Callitricho-Batrachion* vegetation |
| **3280** | Constantly flowing Mediterranean rivers with *Paspalo-Agrostidion* species and hanging curtains of *Salix* and *Populus alba* |
| **3290** | Intermittently flowing Mediterranean rivers of the *Paspalo-Agrostidion* |
| **TEMPERATE HEATH AND SCRUB** | |
| **4060** | Alpine and Boreal heaths |
| **4090** | Endemic oro-Mediterranean heaths with gorse |
| **SCLEROPHYLLOUS SCRUB** | |
| **5110** | Stable xerothermophilous formations with *Buxus sempervirens* on rock slopes (*Berberidion* p.p.) |
| **5210** | Arborescent matorrals with *Juniperus* spp*.* |
| **5230*** | Arborescent matorrals with *Laurus nobilis* |
| **5310** | *Laurus nobilis t*hickets |
| **5330** | Thermo-Mediterranean and pre-desert scrub |
| **5420** | *Sarcopoterium spinosum* phryganas |
| **5430** | Endemic phryganas of the *Euphorbio-Verbascion* |
| **NATURAL AND SEMI-NATURAL GRASSLAND FORMATIONS** | |
| **6110*** | Rupicolous calcareous or basophilic grasslands of the *Alysso-Sedion albi* |
| **6170** | Alpine and subalpine calcareous grasslands |
| **6220*** | Pseudo-steppe with grasses and annuals of the *Thero-Brachypodietea* |
| **6230*** | Species-rich *Nardus* grasslands, on siliceous substrates in mountain areas (and submountain areas, in Continental Europe) |
| **6260*** | Pannonic sand steppes |
| **62Α0** | Eastern sub-mediteranean dry grasslands (Scorzoneratalia villosae) |
| **62D0** | Oro-Moesian acidophilous grasslands |
| **6420** | Mediterranean tall humid herb grasslands of the *Molinio – Holoschoenion* |
| **6430** | Hydrophilous tall herb fringe communities of plains and οf the montane to alpine levels |
| **6510** | Lowland hay meadows (*Alopecurus pratensis, Sanguisorba officinalis*) |
| **RAISED BOGS AND MIRES AND FENS** | |
| **7140** | Transition mires and quaking bogs |
| **7210*** | Calcareous fens with *Cladium mariscus* and species of the *Caricion davallianae* |
| **7220** | Petrifying springs with tufa formation (*Cratoneurion*) |
| **7230** | Alkaline fens |
| **ROCKY HABITATS AND CAVES** | |
| **8140** | Eastern Mediterranean screes |
| **8210** | Calcareous rocky slopes with chasmophytic vegetation |
| **8220** | Siliceous rocky slopes with chasmophytic vegetation |
| **8310** | Caves not open to the public |
| **8320** | Fields of lava and natural excavations |
| **FORESTS** | |
| **9110** | Luzulo-Fagetum beech forests |
| **9130** | Asperulo-Fagetum beech forests |
| **9140** | Medio-European subalpine beech woods with *Acer* and *Rumex arifolius* |
| **9150** | Medio-European limestone beech forests of the *Cephalanthero-Fagion* |
| **9180*** | *Tilio-Acerion* forests of slopes, screes and ravines |
| **91ΒΑ** | Moesian silver fir forests |
| **91CA** | Rhodopide and Balkan Range Scots pine forests |
| **91Ε0*** | Alluvial forests with *Alnus glutinosa* and *Fraxinus excelsior* (*Alno-Padion, Alnionincanae, Salicion albae*) |
| **91F0** | Riparian mixed forests of *Quercus robus, Ulmus Iaevis, Ulmus minor, Fraxinus excelsioror Fraxinus angustifolia* along the great rivers (Ulmenion minoris) |
| **91ΜΟ** | Pannonian-Balkanic turkey oak- sessile oak forests |
| **9250** | *Quercus trojana* woods |
| **9260** | *Castanea sativa* woods |
| **9270** | Hellenic beech forests with *Abies borisii-regis* |
| **9280** | *Quercus frainetto* woods |
| **9290** | *Cupressus* forests (Acero-Cupression) |
| **92Α0** | *Salix alba* and *Populus alba* galleries |
| **92C0** | *Platanus orientalis* and *Liquidambar orientalis* woods (Platanion orientalis) |
| **92D0** | Southern riparian galleries and thickets(Nerio - Tamaricetea andSecurinegion tinctoriae) |
| **9310** | Aegean *Quercus brachyphylla* forests |
| **9320** | *Olea* and *Ceratonia* forests |
| **9340** | *Quercus ilex* and *Quercus rotundifolia* forests |
| **9350** | *Quercus macrolepis* forests |
| **9370*** | Palm groves of *Phoenix* |
| **9380** | Forests of *Ilex aquifolium* |
| **9410** | Acidophilous *Picea* forests of the montane to alpine levels (*Vaccinio-Piceetea*) |
| **9530*** | (Sub-) Mediterranean pine forests with endemic blackpines |
| **9540** | Mediterranean pine forests with endemic Mesogean pines |
| **9560*** | Endemic forests with *Juniperus* spp. |
| **9580** | Mediterranean *Taxus baccata* woods |
| **95A0** | High oro-Mediterranean pine forests |
| **Habitat types of Greek interest** | |
| **1440** | Salt pans |
| **32Β0** | Euro-Siberian annual communities of muddy riverbanks |
| **5150** | *Pteridium aquilinum* stands |
| **5160** | South east sub Mediterranean scrub (*Prunion fruticosae*) |
| **5340** | Eastern Mediterranean Garrigues |
| **5350** | Pseudomaquis |
| **5360** | Formations with *Spartium junceum* |
| **6280** | Oro-Mediterranean grasslands (*Ononido-Rosmarinetea*) |
| **6290** | Mediterranean subnitrophilous grasslands |
| **6450** | Hellenic Supra-Mediterranean wet grasslands |
| **651Α** | Mesic pastures |
| **72Α0** | Reed thickets |
| **72Β0** | Rush communities |
| **8260** | Adiantetalia: *Acrocladio-Adiantetum* |
| **GR 91K0** | Greek forests of *Betula pendula* |
| **GR 91L0** | Supra-Mediterranean stands of *Populus tremula* |
| **925A** | *Ostrya*, *Carpinus* and mixed thermophilous forests |
| **925B** | *Celtis australis* forests |
| **934A** | Greek *Quercus coccifera* woods |
| **951B** | *Abies cephalonica* forests |
